# Supplementary material for: Dietary Cholesterol Contained in Whole Eggs Is Not Well Absorbed and Does Not Acutely Affect Plasma Total Cholesterol Concentration in Men and Women: Results from 2 Randomized Controlled Crossover Studies
Source: PubMed Central journal article supplement (PMC6165023; doi:10.3390/nu10091272), 2018-09-09

Supplemental Figure 1. Baseline-corrected total cholesterol (A) and triacylglycerol (B) content in the TRL fraction in study 1. Values are  $\text{lsmean} \pm \text{SE}$  and different superscript letters indicate statistical differences among no egg, 75 g CWE, and 150 g CWE. CWE, cooked whole egg; TRL, triacylglycerol-rich lipoprotein.

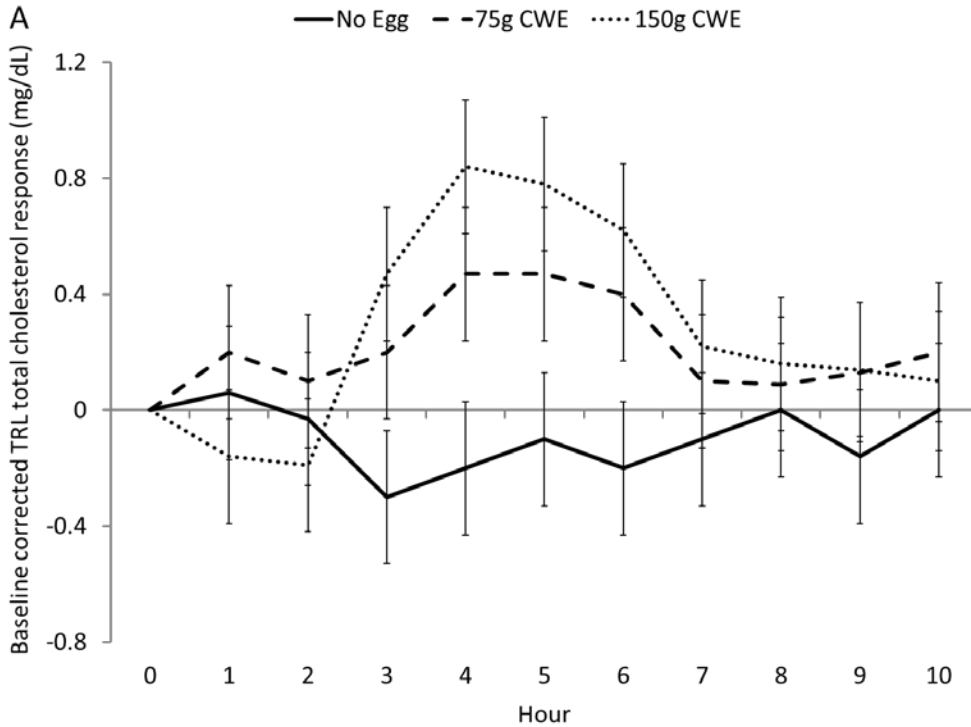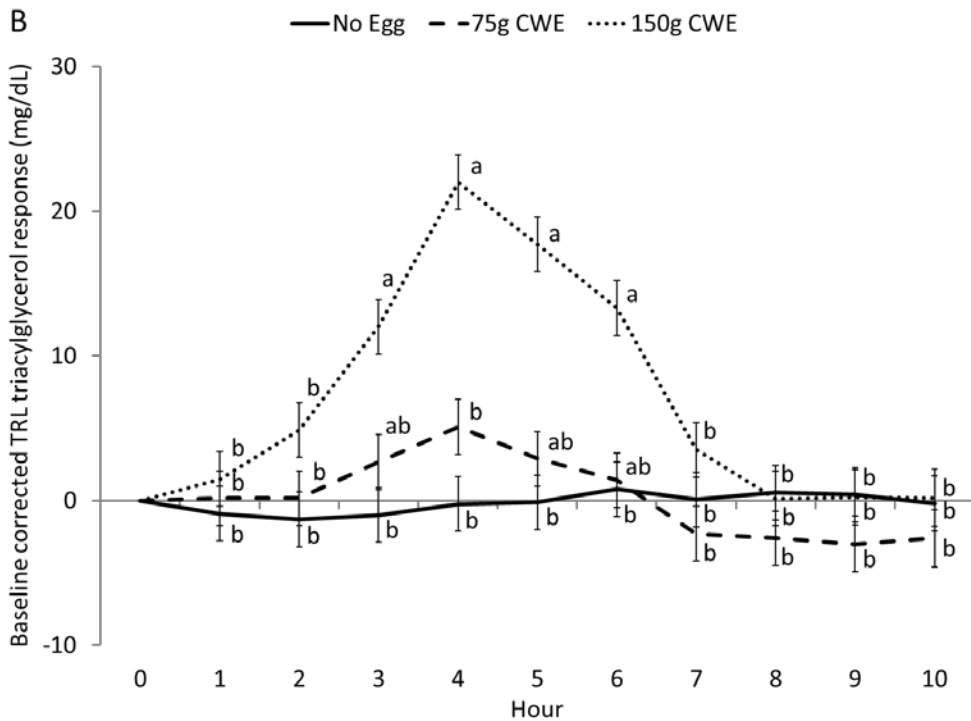

Supplemental Figure 2. Baseline-corrected total cholesterol (A) and triacylglycerol (B) content in the TRL fraction in study 2. Values are  $\text{lsmean} \pm \text{SE}$  and different superscript letters indicate statistical differences between no egg and 100 g CWE. CWE, cooked whole egg; TRL, triacylglycerol-rich lipoprotein.

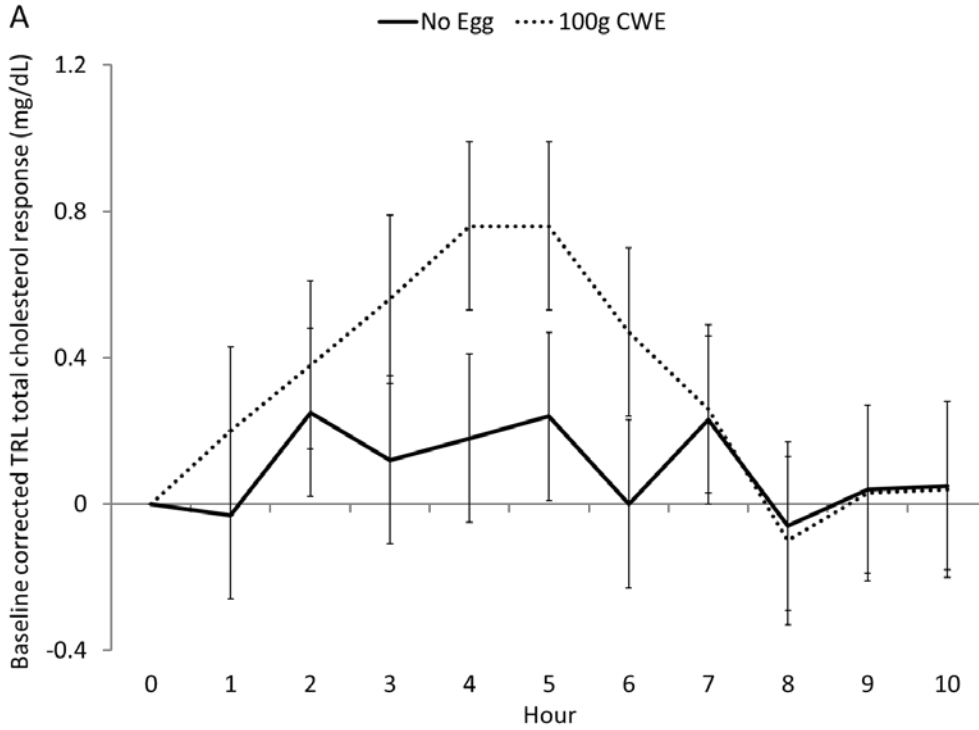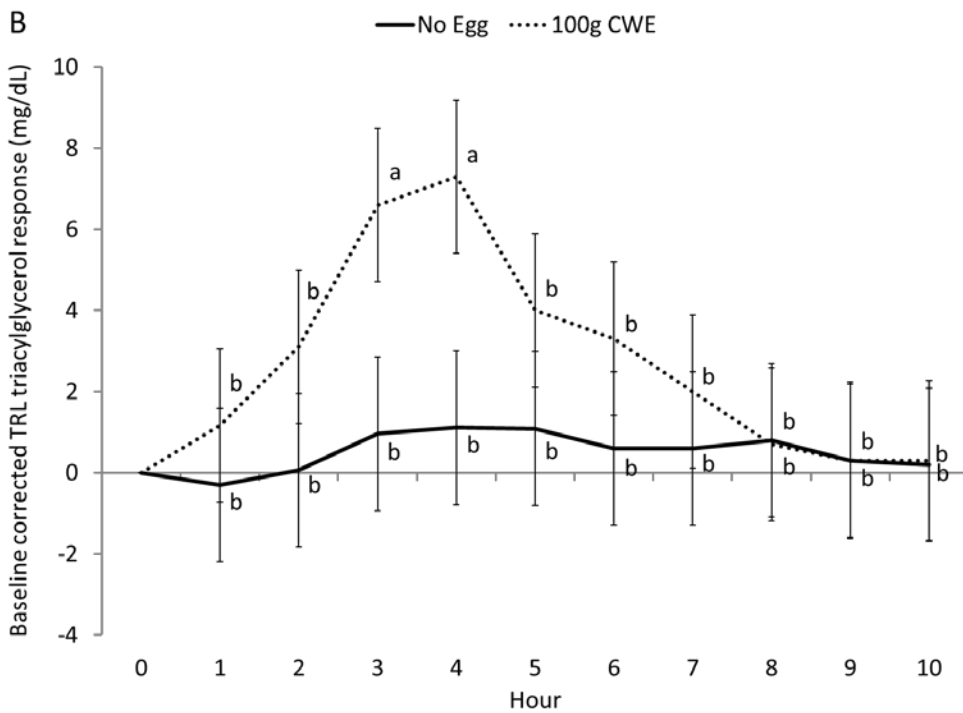

Supplemental Figure 3. Baseline-corrected total cholesterol (A) and triacylglycerol (B) content in plasma in study 1. Values are  $\text{mean} \pm \text{SE}$  and different superscript letters indicate statistical differences among no egg, 75 g CWE, and 150 g CWE. CWE, cooked whole egg.

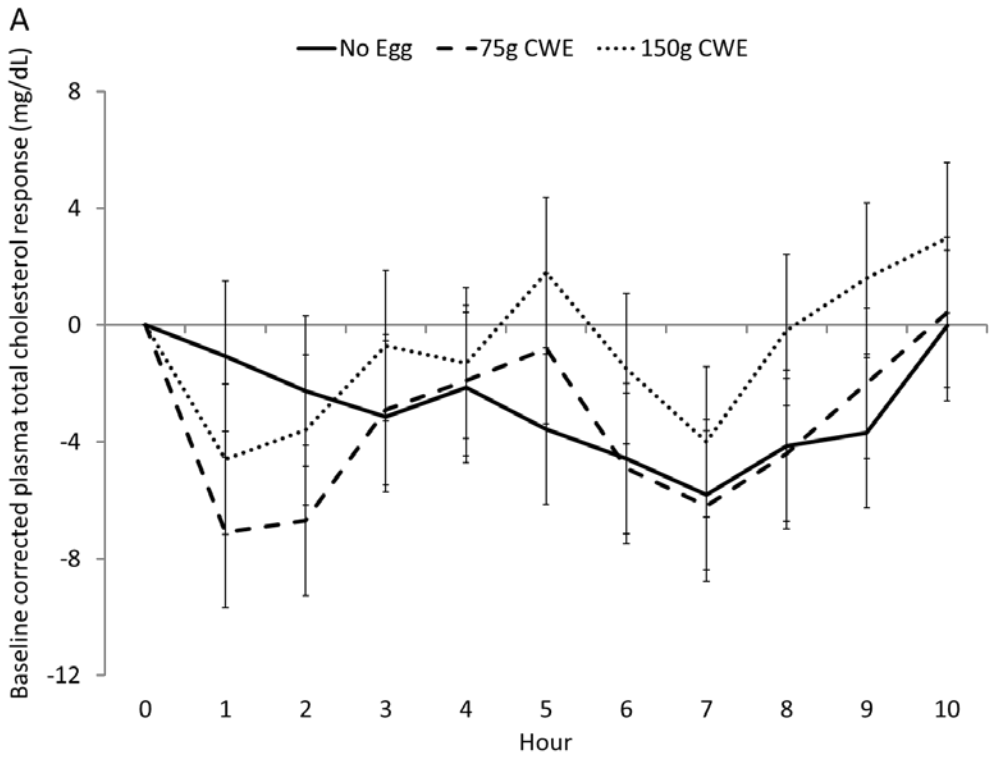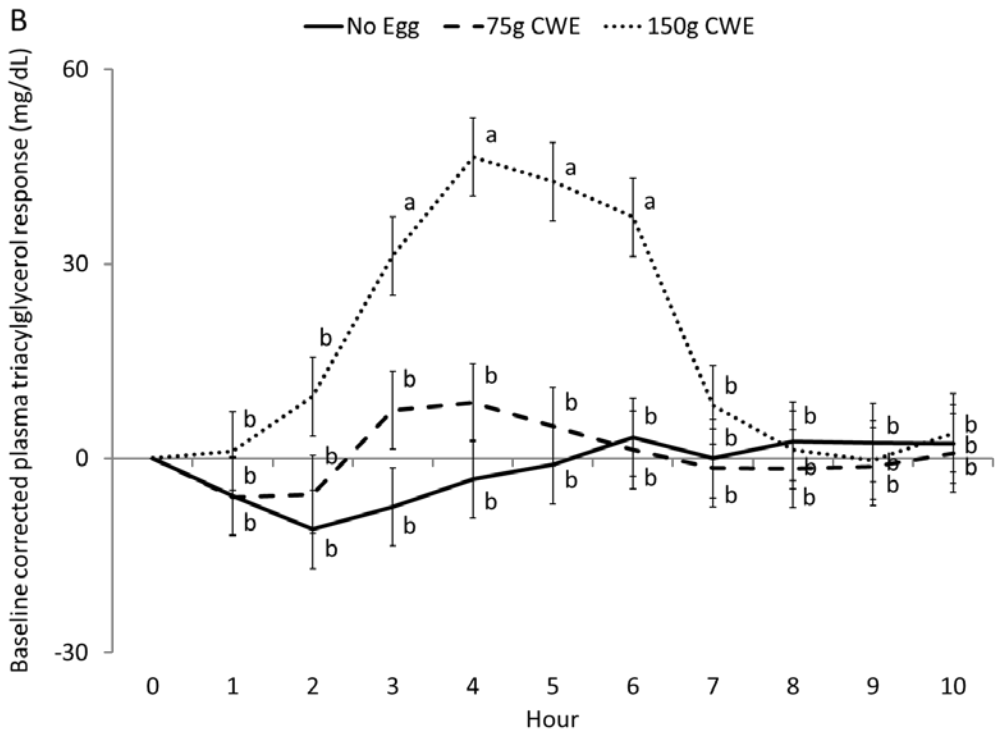

Supplemental Figure 4. Baseline-corrected total cholesterol (A) and triacylglycerol (B) content in plasma in study 2. Values are  $\text{Ismean} \pm \text{SE}$  and different superscript letters indicate statistical differences between no egg and 100 g CWE treatments. CWE, cooked whole egg.

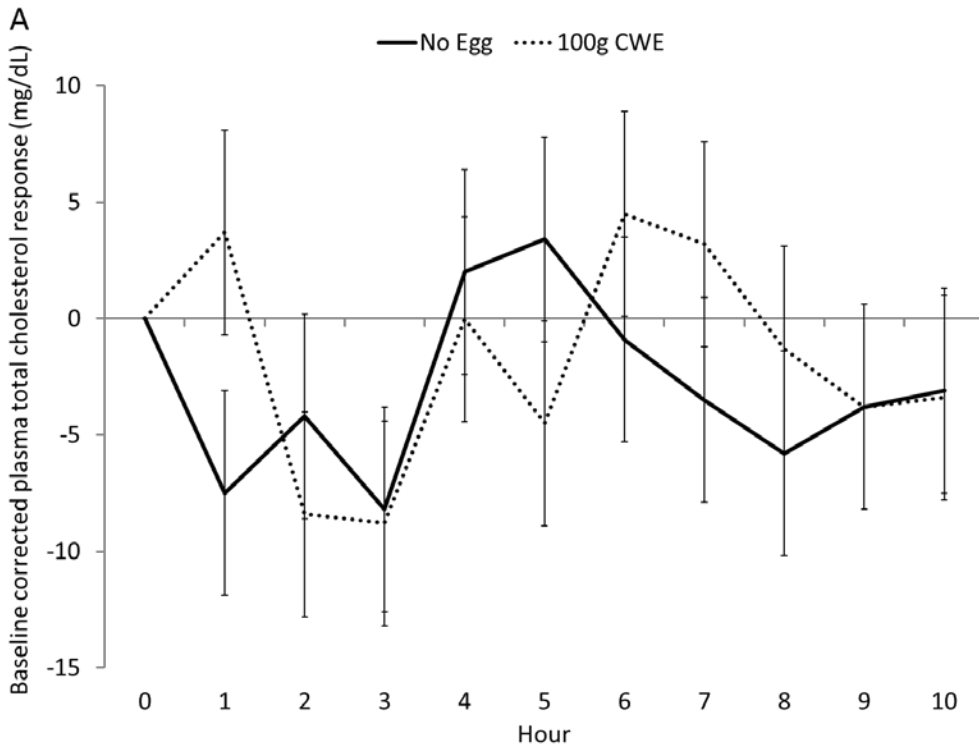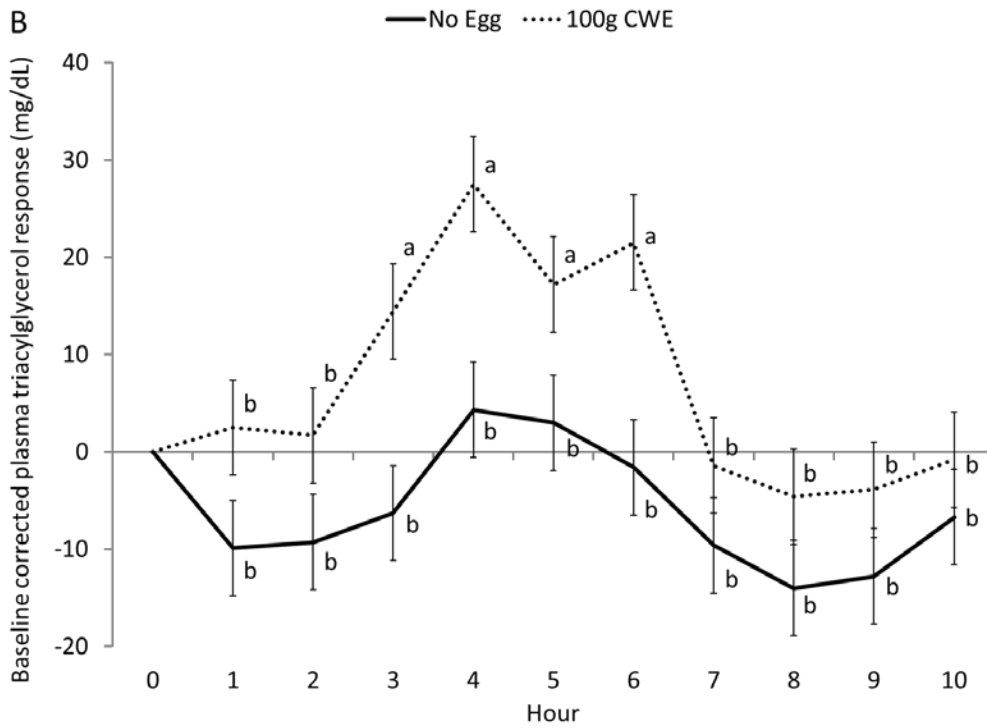

Supplement: nutrients-10-01272-s001.pdf [file nutrients-10-01272-s001.pdf]
